# Supplementary material for: The impact of aerosol on cloud water: a heuristic perspective
Source: Copernicus journal article supplement (doi:10.5194/acp-24-13403-2024), 2024-12-05
Supplement: Supplementary file 1 [file acp-24-13403-2024-supplement.pdf]

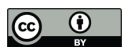

*Supplement of*

## **The impact of aerosol on cloud water: a heuristic perspective**

**Fabian Hoffmann et al.**

*Correspondence to:* Fabian Hoffmann (fa.hoffmann@lmu.de)

The copyright of individual parts of the supplement might differ from the article licence.

**Introduction.** Please refer to the main text for any definitions and references that are not stated here.

**Text S1.** As argued in the main text, the charge/discharge to the thermodynamic carrying capacity can be represented as

$$\frac{f(L_{\infty,h}) - f(L)}{\tau_t},$$

where  $L$  is the liquid water path,  $L_{\infty,h}$  the thermodynamic carrying capacity, and  $\tau_t$  the timescale of this process. However, the form of the function  $f$  is not known. In the main text,  $f(x) = x$  is used, to which we refer to as linear thermodynamic charge/discharge. In this supplement, a logarithmic version in the form of  $f(x) = \ln(x)$  is explored.

Using the same setup as for Fig. 2, Fig. S2 shows the sensitivity of the model with logarithmic thermodynamic charge/discharge to the model parameters (a)  $\tau_t$ , (b)  $c_1$ , (c)  $L_0$ , and (d)  $m_{\infty,h}$ . Without addressing the details of each panel, one sees clearly that the model assumes the prescribed slope  $m_{\infty,h}$  for high  $N$  as expected (thin red lines). For small  $N$ , however, the slope  $m_1 = 0.43$  (thin black line) is larger than  $m_{\infty,h}$  (thin blue lines). The reason for this is the faster logarithmic thermodynamic recharge of precipitation losses. While larger  $L$  at low  $N$  could be remedied with an increased precipitation constant  $c_1$  (panel b),  $m_1$  cannot be tuned to match  $m_{\infty,h}$  and hence the ensemble LES results of Glassmeier et al. (2021). In fact,  $m_1$  does not vary for  $m_{\infty,h} < 2.0$  when logarithmic thermodynamic charge/discharge is used (panel d), indicating fundamental differences between the linear and logarithmic formulations. Based on this analysis, we find that linear thermodynamic charge/discharge agrees better with our reference (Glassmeier et al., 2021), and is thus used in this study.

**Text S2.** As stated in (3) of the main text, the temporal change of  $L$  is given by

$$\frac{dL}{dt} = \frac{L_{\infty,h} - L}{\tau_t} - c_1 \frac{L^{3/2}}{N}.$$

From the steady state solution of (3), we determine the derivative with respect to  $N$  as

$$0 = \frac{d}{dN} \left[ \frac{L_{\infty,h} - L_{\infty}}{\tau_t} - c_1 \frac{L_{\infty}^{3/2}}{N} \right].$$

Solving for  $dL_{\infty}/dN$  gives

$$\frac{dL_{\infty}}{dN} = \left( \frac{1}{\tau_t} \frac{dL_{\infty,h}}{dN} + c_1 \frac{L_{\infty}^{3/2}}{N^2} \right) \left( \frac{1}{\tau_t} + \frac{3}{2} c_1 \frac{L_{\infty}^{1/2}}{N} \right)^{-1}.$$

The slope  $m$  relates to  $dL/dN$  as

$$m = \frac{d \ln(L)}{d \ln(N)} = \frac{N}{L} \frac{dL}{dN}.$$

This yields for the steady state

$$m_{\infty} = \left( \frac{1}{\tau_t} \frac{N}{L_{\infty}} \frac{dL_{\infty,h}}{dN} + c_1 \frac{L_{\infty}^{1/2}}{N} \right) \left( \frac{1}{\tau_t} + \frac{3}{2} c_1 \frac{L_{\infty}^{1/2}}{N} \right)^{-1}.$$

Using definition (5), we determine that

$$\begin{aligned} \frac{N}{L_{\infty}} \frac{dL_{\infty,h}}{dN} &= \frac{N}{L_{\infty}} \frac{d}{dN} \left[ L_0 \left( \frac{N}{N_0} \right)^{m_{\infty,h}} \right] \\ &= m_{\infty,h} \frac{L_{\infty,h}}{L_{\infty}} \\ &= m_{\infty,h} \left[ 1 + \frac{2}{3} \frac{\tau_t}{\tau_p} \right], \end{aligned}$$

where we used (7) for the last equality. With the definition of the precipitation timescale (4),

$$\tau_p = \frac{2}{3} \frac{1}{c_1} \frac{N}{L^{1/2}},$$

we find

$$m_\infty = \left( \frac{1}{\tau_t} m_{\infty,h} + \frac{1}{\tau_p} \frac{2}{3} (m_{\infty,h} + 1) \right) \left( \frac{1}{\tau_t} + \frac{1}{\tau_p} \right)^{-1}.$$

This expression can be rearranged to yield

$$m_\infty = \frac{m_{\infty,h}}{1 + \frac{\tau_t}{\tau_p}} + \frac{\frac{2}{3} (m_{\infty,h} + 1)}{1 + \frac{\tau_p}{\tau_t}},$$

which is (8) in the main text.

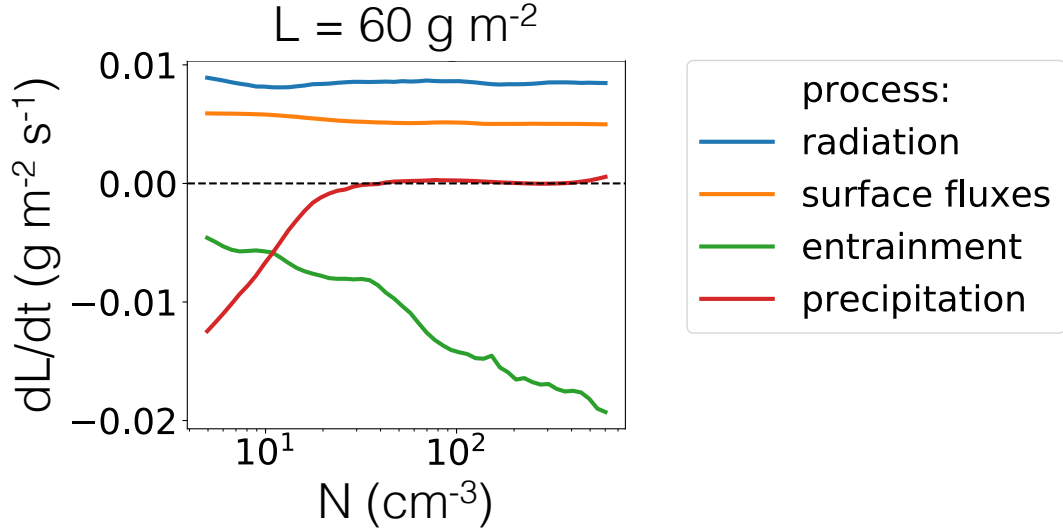

**Figure S1.** The temporal change of  $L$  as a function of  $N$  for thermodynamics [radiation (blue), surface fluxes (orange), and entrainment (green)] and precipitation (red) is shown for  $L = 60 \text{ g m}^{-2}$ . Note that this plot is based on the data shown in Fig. 3 of Hoffmann et al. (2020), but presented to fit the arguments of this study. Please refer to Hoffmann et al. (2020) for details on how this graph has been created.

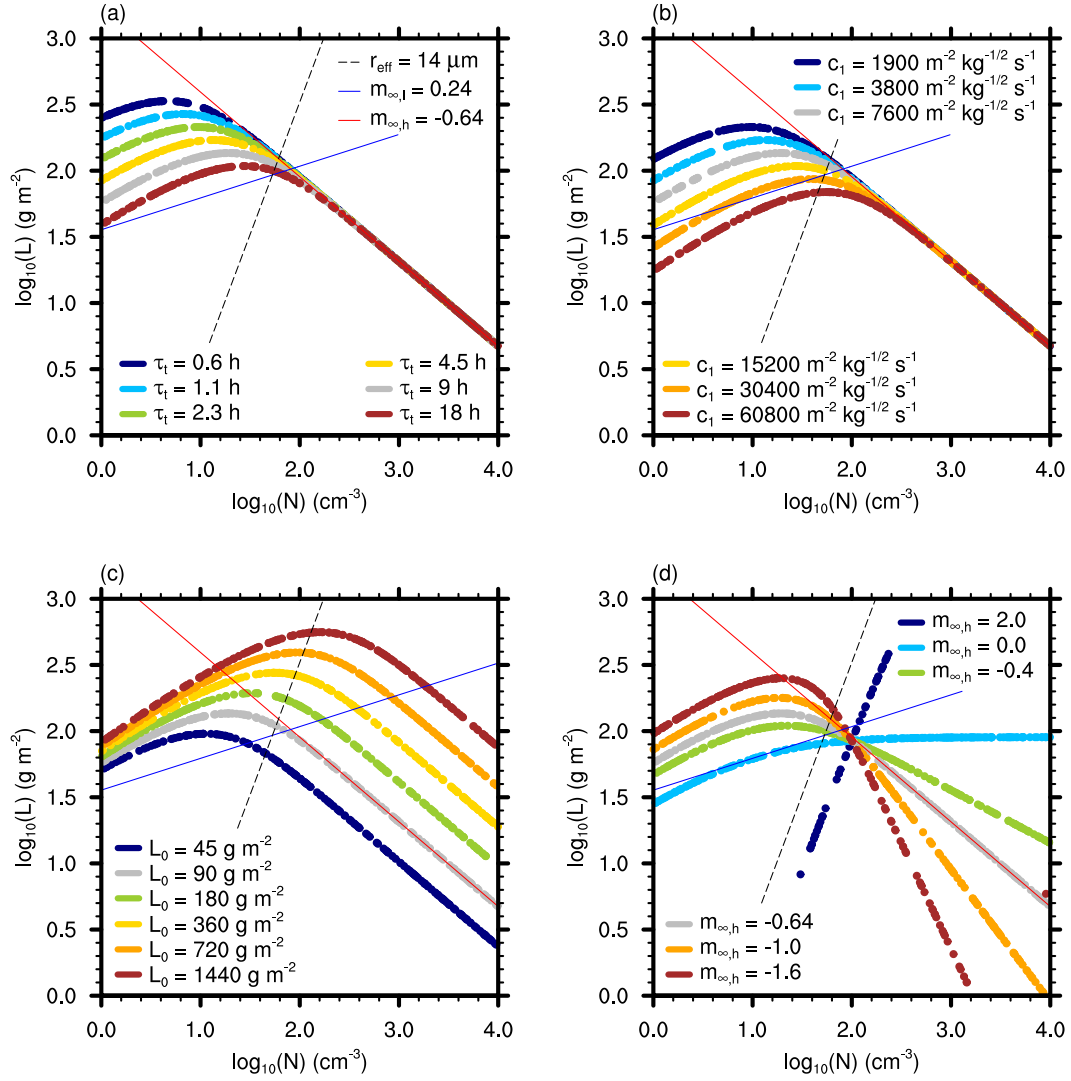

**Figure S2.** For a system with logarithmic thermodynamic charge/discharge, we show  $L$  after 7 days as a function of  $N$  for variations in (a)  $\tau_t$ , (b)  $c_1$ , (c)  $L_0$ , and (d)  $m_{\infty,h}$  (colored dots). The default configuration is differentiated by gray dots. Plots are overlaid with  $m_{\infty,l} = 0.24$ ,  $m_{\infty,h} = -0.64$ , and  $m_1 = 0.43$  (thin blue, red, and black lines, respectively), and the  $14 \mu\text{m}$  cloud top effective droplet radius (black dashed line).

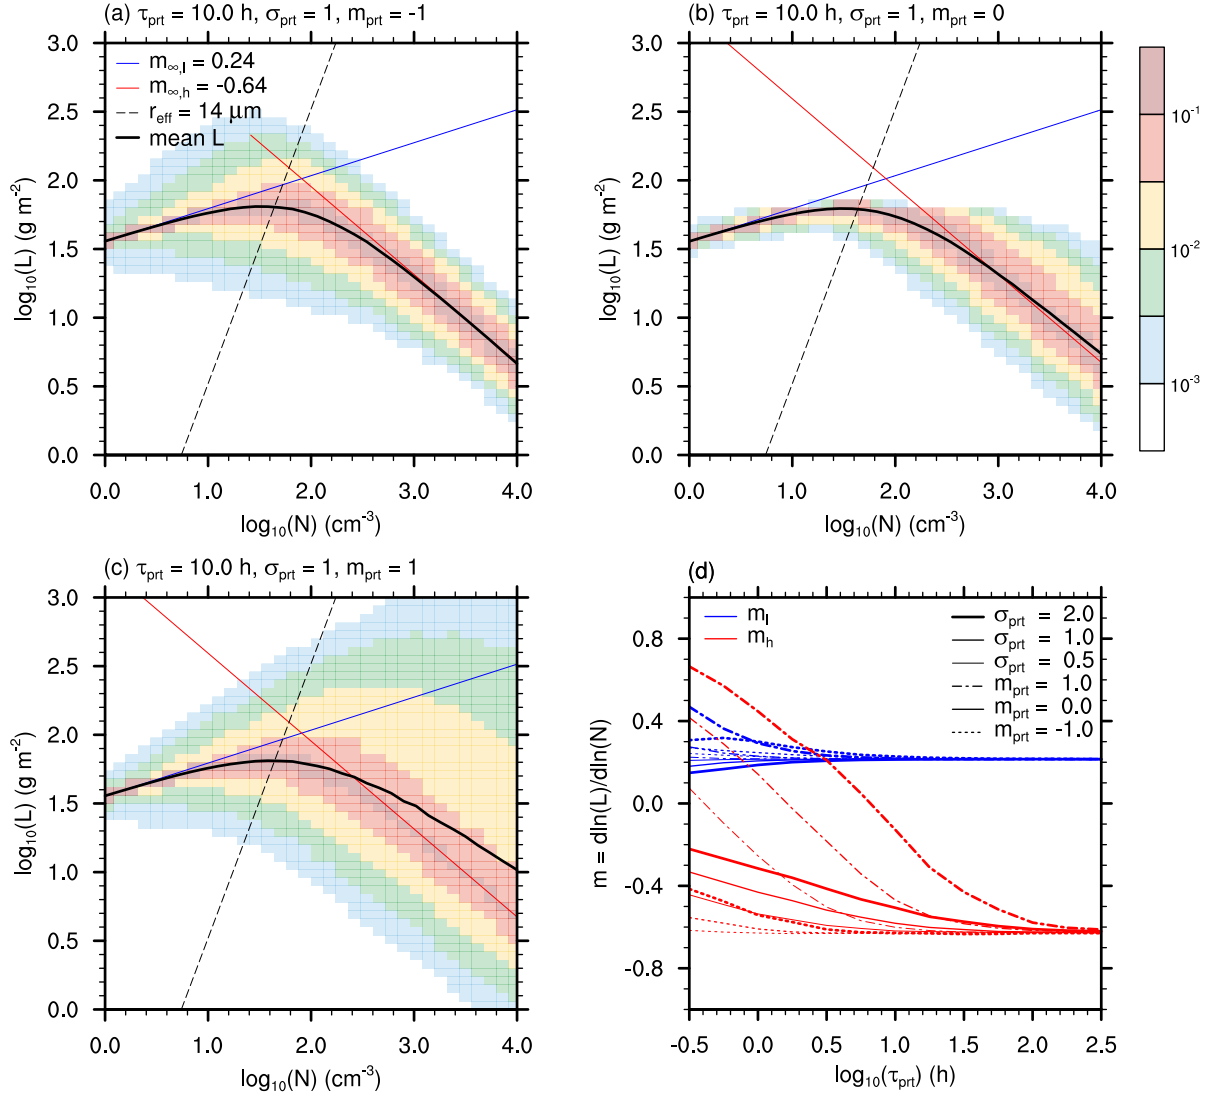

**Figure S3.** Joint  $L$ - $N$  histograms (opaque colors) and mean  $\ln(L)$  (thick black line) for perturbations in  $L$  and  $N$  for  $\tau_{\text{prt}} = 10$  h,  $\sigma_{\text{prt}} = 1.0$  with (a)  $m_{\text{prt}} = -1$ , (b) 0.0, and (c) 1.0. Plots are overlaid with  $m_{\infty, l} = 0.24$  and  $m_{\infty, h} = -0.64$  (blue and red lines), and the  $14 \mu\text{m}$  cloud top effective droplet radius (black dashed line). Note that the histograms are normalized such that the integral over each  $N$  column yields 1 (cf. Gryspeerdt et al., 2019). Panel (d) shows the fitted slopes  $m_l$  (blue lines) and  $m_h$  (red lines) for  $\sigma_{\text{prt}} = 0.5$  (thin lines), 1.0 (medium lines), 2.0 (thick lines), and  $m_{\text{prt}} = -1.0$  (dashed lines), 0.0 (continuous lines), 1.0 (dashdotted lines).
